# Supplementary material
Source: ML conference proceedings conference paper supplement (https://proceedings.neurips.cc/paper_files/paper/2021/hash/c2c701fe341a7756ca7fd4eaa83ff63f-Abstract.html)
Supplement: Supplementary file 1 [file c2c701fe341a7756ca7fd4eaa83ff63f-Supplemental.zip]

Archive with 74 entries (70 files):
- SupplementaryMaterials/
- __MACOSX/._SupplementaryMaterials
- SupplementaryMaterials/.DS_Store
- __MACOSX/SupplementaryMaterials/._.DS_Store
- SupplementaryMaterials/test/
- __MACOSX/SupplementaryMaterials/._test
- SupplementaryMaterials/opt/
- __MACOSX/SupplementaryMaterials/._opt
- SupplementaryMaterials/submission_7321_supplementary.pdf
- SupplementaryMaterials/data/
- __MACOSX/SupplementaryMaterials/._data
- SupplementaryMaterials/readme.pdf
- __MACOSX/SupplementaryMaterials/._readme.pdf
- SupplementaryMaterials/test/test_321.m
- __MACOSX/SupplementaryMaterials/test/._test_321.m
- SupplementaryMaterials/test/test_313_inner.m
- __MACOSX/SupplementaryMaterials/test/._test_313_inner.m
- SupplementaryMaterials/test/test_312_inner.m
- __MACOSX/SupplementaryMaterials/test/._test_312_inner.m
- SupplementaryMaterials/test/test_331.m
- __MACOSX/SupplementaryMaterials/test/._test_331.m
- SupplementaryMaterials/test/test_322.m
- __MACOSX/SupplementaryMaterials/test/._test_322.m
- SupplementaryMaterials/test/test_313.m
- __MACOSX/SupplementaryMaterials/test/._test_313.m
- SupplementaryMaterials/test/test_332.m
- __MACOSX/SupplementaryMaterials/test/._test_332.m
- SupplementaryMaterials/test/test_323.m
- __MACOSX/SupplementaryMaterials/test/._test_323.m
- SupplementaryMaterials/test/test_322_inner.m
- __MACOSX/SupplementaryMaterials/test/._test_322_inner.m
- SupplementaryMaterials/test/test_332_inner.m
- __MACOSX/SupplementaryMaterials/test/._test_332_inner.m
- SupplementaryMaterials/test/test_312.m
- __MACOSX/SupplementaryMaterials/test/._test_312.m
- SupplementaryMaterials/test/test_333_inner.m
- __MACOSX/SupplementaryMaterials/test/._test_333_inner.m
- SupplementaryMaterials/test/test_323_inner.m
- __MACOSX/SupplementaryMaterials/test/._test_323_inner.m
- SupplementaryMaterials/test/test_333.m
- __MACOSX/SupplementaryMaterials/test/._test_333.m
- SupplementaryMaterials/test/test_324.m
- __MACOSX/SupplementaryMaterials/test/._test_324.m
- SupplementaryMaterials/test/test_311.m
- __MACOSX/SupplementaryMaterials/test/._test_311.m
- SupplementaryMaterials/opt/proxlin.m
- SupplementaryMaterials/opt/proxptblind.m
- SupplementaryMaterials/opt/proxlinblind.m
- SupplementaryMaterials/opt/setdefaultparams.m
- SupplementaryMaterials/opt/proxlinblindbatch.m
- SupplementaryMaterials/opt/proxpt.m
- SupplementaryMaterials/opt/proxlinblindsolve.m
- __MACOSX/SupplementaryMaterials/opt/._proxlinblindsolve.m
- SupplementaryMaterials/opt/proxsgd.m
- SupplementaryMaterials/opt/proxopt.m
- SupplementaryMaterials/opt/proxsgdblindbatch.m
- SupplementaryMaterials/opt/proxsgdblind.m
- SupplementaryMaterials/opt/proxlinsolve.m
- SupplementaryMaterials/opt/proxlinbatch.m
- SupplementaryMaterials/opt/proxptbatch.m
- SupplementaryMaterials/opt/proxptblindbatch.m
- __MACOSX/SupplementaryMaterials/opt/._proxptblindbatch.m
- SupplementaryMaterials/data/loadzip.m
- __MACOSX/SupplementaryMaterials/data/._loadzip.m
- SupplementaryMaterials/data/zipcode.mat
- __MACOSX/SupplementaryMaterials/data/._zipcode.mat
- SupplementaryMaterials/data/DataGenerator.m
- __MACOSX/SupplementaryMaterials/data/._DataGenerator.m
- SupplementaryMaterials/data/GetDataBlind.m
- __MACOSX/SupplementaryMaterials/data/._GetDataBlind.m
- SupplementaryMaterials/data/GetData.m
- __MACOSX/SupplementaryMaterials/data/._GetData.m
- SupplementaryMaterials/data/synthetic.zip
- __MACOSX/SupplementaryMaterials/data/._synthetic.zip
