# Supplementary material
Source: ML conference proceedings conference paper supplement (https://proceedings.neurips.cc/paper_files/paper/2021/hash/c2c701fe341a7756ca7fd4eaa83ff63f-Abstract.html)
Supplement: Supplementary file 1 [file c2c701fe341a7756ca7fd4eaa83ff63f-Supplemental.zip › SupplementaryMaterials/data/GetDataBlind.m]

function [U, V, b] = GetDataBlind(x, m, kappa, pfail)

% Generate data
[U, ~] = GetData(x, m, kappa, pfail);
[V, ~] = GetData(x, m, kappa, pfail);

% Compute b
b = (U * x) .* (V * x) + (rand(m, 1) < pfail).* randn(m, 1) * 5;

end % End function
