# Supplementary material
Source: ML conference proceedings conference paper supplement (https://proceedings.neurips.cc/paper_files/paper/2021/hash/c2c701fe341a7756ca7fd4eaa83ff63f-Abstract.html)
Supplement: Supplementary file 1 [file c2c701fe341a7756ca7fd4eaa83ff63f-Supplemental.zip › SupplementaryMaterials/test/test_321.m]

% Test script for Zipcode Phase Retrieval Momentum (3.2.1)
clear;
clc;
close all;

addpath(fullfile("..", "opt"));
addpath(fullfile("..", "data"));

idx = 2;
pfail = 2;
loadzip(pfail / 10, idx);

beta = 0.9;
file = "zipcode_" + idx + "_pfail_" + pfail + ".mat";
load(file);
nTest = 20;

[~, n] = size(data.A);

alpharange = logspace(0, 1, 10);

bestloss = data.bestloss;
params = setdefaultparams(data);
params.use_vm = 0;
params.beta = 0;
params.maxiter = 400;
params.gamma = 1/sqrt(params.maxiter * 768);
params.adp_param = 0;
params.alpha_0 = 1;
params.early_stop = true;
params.logscale = false;
params.show_info = false;

nSgdEpochtoOpt = zeros(nTest, length(alpharange));
nSgdmEpochtoOpt = zeros(nTest, length(alpharange));
nProxLinEpochtoOpt = zeros(nTest, length(alpharange));
nProxLinmEpochtoOpt = zeros(nTest, length(alpharange));
nProxPtEpochtoOpt = zeros(nTest, length(alpharange));
nProxPtmEpochtoOpt = zeros(nTest, length(alpharange));

for k = 1:length(alpharange)
    params.alpha_0 = alpharange(k);
    for i = 1:nTest
        params.init_x = randn(n, 1);
        params.beta = 0;
        % Test SGD
        params.optmethod = "SGD";
        [sgdsol, sgdinfo] = proxopt(data, params);
        nSgdEpochtoOpt(i, k) = sgdinfo.nepochs;
        
        % Test Proximal linear
        params.optmethod = "ProxLin";
        [proxlinsol, proxlininfo] = proxopt(data, params);
        
        nProxLinEpochtoOpt(i, k) = proxlininfo.nepochs;
        
        % Test Proximal point
        params.optmethod = "ProxPt";
        [proxptsol, proxptinfo] = proxopt(data, params);
        nProxPtEpochtoOpt(i, k) = proxptinfo.nepochs;
        
        % Test methods with momentum
        params.beta = beta;
        
        % Test SGD
        params.optmethod = "SGD";
        [sgdsolm, sgdinfom] = proxopt(data, params);
        nSgdmEpochtoOpt(i, k) = sgdinfom.nepochs;
        
        % Test Proximal linear
        params.optmethod = "ProxLin";
        [proxlinsolm, proxlininfom] = proxopt(data, params);
        nProxLinmEpochtoOpt(i, k) = proxlininfom.nepochs;
        
        % Test Proximal point
        params.optmethod = "ProxPt";
        [proxptsolm, proxptinfom] = proxopt(data, params);
        nProxPtmEpochtoOpt(i, k) = proxptinfom.nepochs;
        
        
    end % End for
end % End for

% Plot the summary graph
[m, ~] = size(data.A);
num_iter = params.maxiter * m;
xcord = alpharange;

semilogx(xcord, sum(nSgdEpochtoOpt / nTest, 1), "-+", "LineWidth", 2);
hold on;

semilogx(xcord, (sum(nProxLinEpochtoOpt / nTest, 1)), "-o", "LineWidth", 2);
hold on;

semilogx(xcord, (sum(nProxPtEpochtoOpt / nTest, 1)), "-x", "LineWidth", 2);
hold on;

semilogx(xcord, (sum(nSgdmEpochtoOpt / nTest, 1)), "-s", "LineWidth", 2 , "LineStyle", "--");
hold on;

semilogx(xcord, (sum(nProxLinmEpochtoOpt / nTest, 1)), "-*", "LineWidth", 2, "LineStyle", "--");
hold on;

semilogx(xcord, (sum(nProxPtmEpochtoOpt / nTest, 1)), "-d", "LineWidth", 2, "LineStyle", "--");
hold on;

set(gca, "FontSize", 20, "FontWeight", "bold")
xlim([min(alpharange), max(alpharange)]);

% xlabel("alpha0");
% ylabel("epochs");

legend(["SGD", "SPL", "SPP", "SEGD",...
    "SEPL", "SEPP"], "FontSize", 20);

save("zipcode_idx_" + idx + "_pfail_" + pfail + "_momentum_" + beta + "_epoch.mat");
savefig("zipcode_idx_" + idx + "_pfail_" + pfail + "_momentum_" + beta * 100 + "_epoch.fig");

hold off;
